# Supplementary material for: Tsaokoic Acid: A New Bicyclic Nonene from the Fruits of Amomum tsao-ko with Acetylcholinesterase Inhibitory Activity
Source: MDPI journal article supplement (doi:10.3390/molecules28062602), 2023-03-13
Supplement: s1 [file s1]

## Supplementary Materials

### **Tsaokoic acid: a new bicyclic nonene from the fruits of *Amomum tsao-ko* with acetylcholinesterase inhibitory activity**

Hyunyoung Kim <sup>1,#</sup>, Hwaryeong Lee <sup>1,#</sup>, Hee Jin Jung <sup>3</sup>, Sang Gyun Noh <sup>3</sup>, Isoo Youn <sup>1</sup>,  
Hyunkyung Kwak <sup>1</sup>, Yeju Lee <sup>1</sup>, Sang-Jip Nam <sup>2</sup>, Soosung Kang <sup>1</sup>, Hae Young Chung <sup>3</sup> and Eun  
Kyoung Seo <sup>1,\*</sup>

<sup>1</sup>Graduate School of Pharmaceutical Sciences, College of Pharmacy, Ewha Womans University, Seoul 03760, Korea

<sup>2</sup>Department of Chemistry and Nanoscience, Ewha Womans University, Seoul 03760, Korea

<sup>3</sup>Department of Pharmacy, College of Pharmacy, Pusan National University, Busan 46241, Korea

\*Correspondence: yuny@ewha.ac.kr (E.K.S.)

<sup>#</sup>Equally contributed in this study.

## Contents

|                                                                                                      |    |
|------------------------------------------------------------------------------------------------------|----|
| Table S1. AChE-inhibitory activity of the isolates <b>1-4</b> from <i>A. tsao-ko</i> .....           | 4  |
| Figure S1. <sup>1</sup> H NMR spectrum of <b>1</b> (400 MHz, CD <sub>3</sub> OD) .....               | 5  |
| Figure S2. <sup>13</sup> C NMR spectrum of <b>1</b> (100 MHz, CD <sub>3</sub> OD) .....              | 5  |
| Figure S3. DEPT-135 NMR spectrum of <b>1</b> (100 MHz, CD <sub>3</sub> OD) .....                     | 6  |
| Figure S4. <sup>1</sup> H- <sup>13</sup> C HSQC NMR spectrum of <b>1</b> (CD <sub>3</sub> OD) .....  | 6  |
| Figure S5. <sup>1</sup> H- <sup>13</sup> C HMBC NMR spectrum of <b>1</b> (CD <sub>3</sub> OD) .....  | 7  |
| Figure S6. <sup>1</sup> H- <sup>1</sup> H COSY NMR spectrum of <b>1</b> (CD <sub>3</sub> OD) .....   | 7  |
| Figure S7. <sup>1</sup> H- <sup>1</sup> H NOESY NMR spectrum of <b>1</b> (CD <sub>3</sub> OD) .....  | 8  |
| Figure S8. UV spectrum of <b>1</b> .....                                                             | 8  |
| Figure S9. IR spectrum of <b>1</b> .....                                                             | 9  |
| Figure S10. HRESIMS spectrum of <b>1</b> .....                                                       | 9  |
| Figure S11. <sup>1</sup> H NMR spectrum of <b>2</b> (400 MHz, CDCl <sub>3</sub> ) .....              | 10 |
| Figure S12. <sup>13</sup> C NMR spectrum of <b>2</b> (100 MHz, CDCl <sub>3</sub> ) .....             | 10 |
| Figure S13. DEPT-135 NMR spectrum of <b>2</b> (100 MHz, CDCl <sub>3</sub> ) .....                    | 11 |
| Figure S14. <sup>1</sup> H- <sup>13</sup> C HSQC NMR spectrum of <b>2</b> (CDCl <sub>3</sub> ) ..... | 11 |
| Figure S15. <sup>1</sup> H- <sup>13</sup> C HMBC NMR spectrum of <b>2</b> (CDCl <sub>3</sub> ) ..... | 12 |
| Figure S16. <sup>1</sup> H- <sup>1</sup> H COSY NMR spectrum of <b>2</b> (CDCl <sub>3</sub> ) .....  | 12 |
| Figure S17. <sup>1</sup> H- <sup>1</sup> H NOESY NMR spectrum of <b>2</b> (CDCl <sub>3</sub> ) ..... | 13 |
| Figure S18. UV spectrum of <b>2</b> .....                                                            | 13 |
| Figure S19. IR spectrum of <b>2</b> .....                                                            | 14 |

|                                                                                                |    |
|------------------------------------------------------------------------------------------------|----|
| Figure S20. HRESIMS spectrum of <b>2</b>                                                       | 14 |
| Figure S21. $^1\text{H}$ -NMR (400 MHz, $\text{CD}_3\text{OD}$ ) of (R)-MTPA ester of <b>1</b> | 15 |
| Figure S22. $^1\text{H}$ -NMR (400 MHz, $\text{CD}_3\text{OD}$ ) of (S)-MTPA ester of <b>1</b> | 15 |
| Figure S23. $^1\text{H}$ -NMR (400 MHz, $\text{CDCl}_3$ ) of (R)-MTPA ester of <b>2</b>        | 16 |
| Figure S24. $^1\text{H}$ -NMR (400 MHz, $\text{CDCl}_3$ ) of (S)-MTPA ester of <b>2</b>        | 16 |

|                            | Concentration ( $\mu$ M) | Inhibition (%) | IC <sub>50</sub> ( $\mu$ M) | sd <sup>a</sup> |
|----------------------------|--------------------------|----------------|-----------------------------|-----------------|
| tsaokoic acid ( <b>1</b> ) | 2                        | 2.09           | 32.78                       | 1.00            |
|                            | 10                       | 29.50          |                             |                 |
|                            | 50                       | 70.92          |                             |                 |
| Tsaokoin ( <b>2</b> )      | 2                        | -6.07          | 41.70                       | 3.19            |
|                            | 10                       | 7.74           |                             |                 |
|                            | 50                       | 62.13          |                             |                 |
| Vanillin ( <b>3</b> )      | 2                        | -1.88          | 39.25                       | 1.81            |
|                            | 10                       | 6.07           |                             |                 |
|                            | 50                       | 65.69          |                             |                 |
| Tsaokoarylone ( <b>4</b> ) | 2                        | -11.93         | 31.13                       | 1.24            |
|                            | 10                       | 30.75          |                             |                 |
|                            | 50                       | 78.66          |                             |                 |
| Berberine                  | 0.04                     | 20.71          | 0.19                        | 0.09            |
|                            | 0.2                      | 73.43          |                             |                 |
|                            | 1                        | 95.82          |                             |                 |

<sup>a</sup>Standard deviation

Table S1. AChE-inhibitory activity of the isolates **1-4** from *A. tsao-ko*

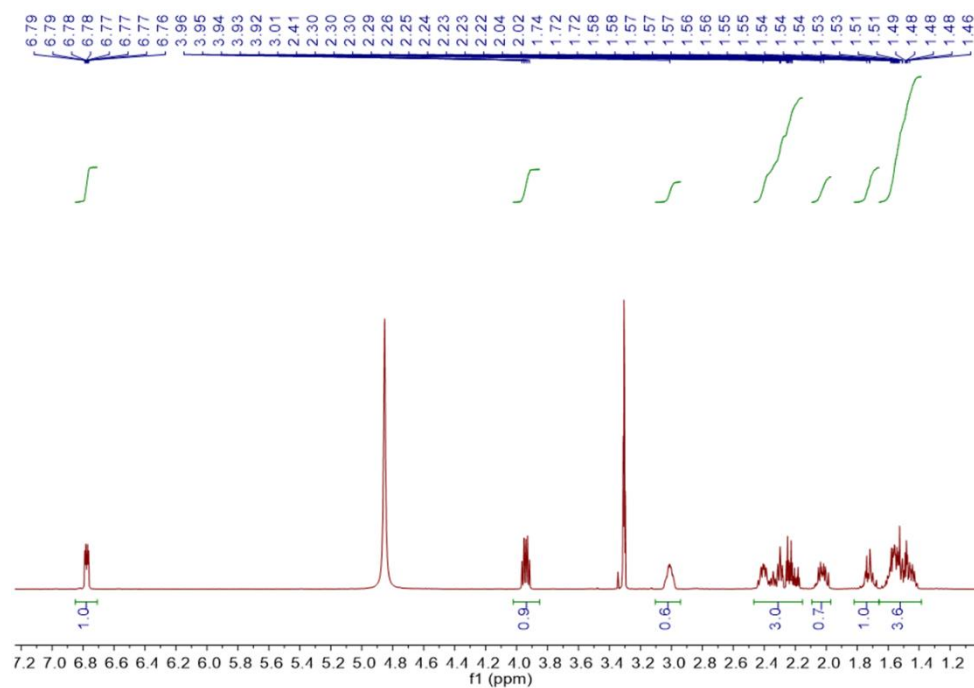

Figure S1. <sup>1</sup>H NMR spectrum of **1** (400 MHz, CD<sub>3</sub>OD)

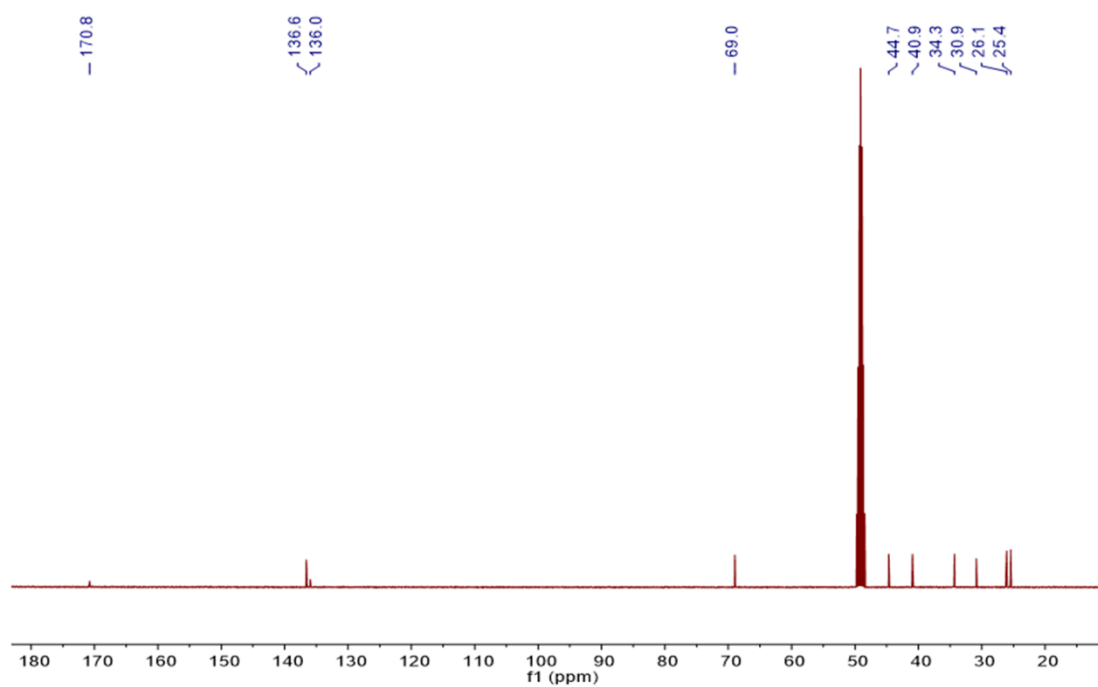

Figure S2. <sup>13</sup>C NMR spectrum of **1** (100 MHz, CD<sub>3</sub>OD)

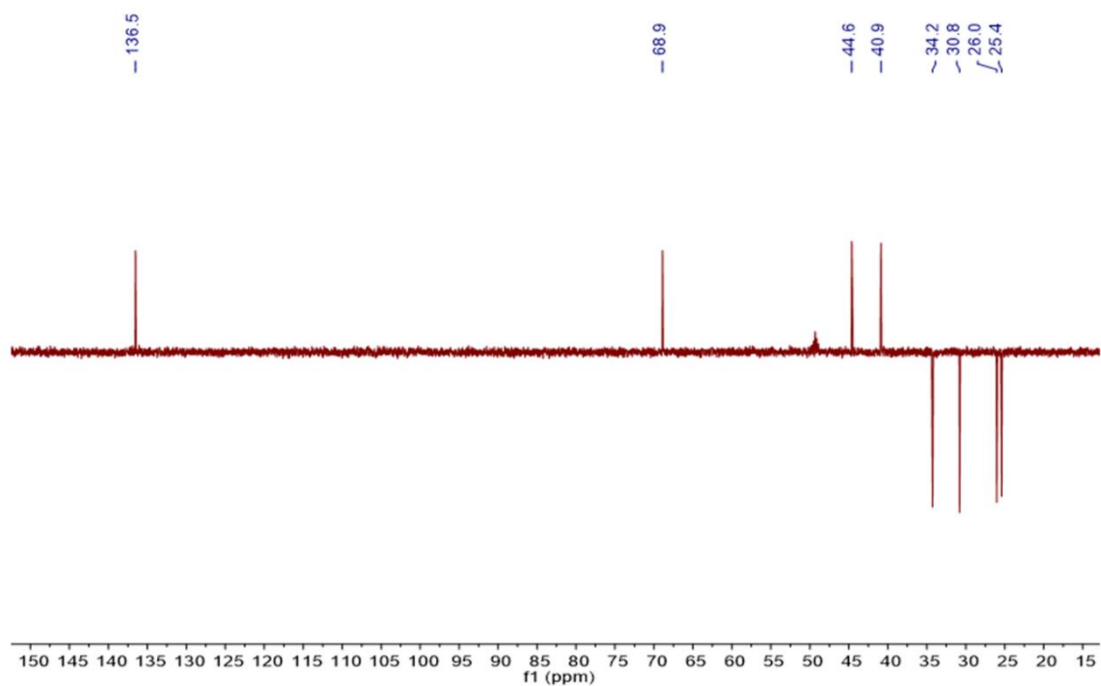

Figure S3. DEPT-135 NMR spectrum of **1** (100 MHz, CD<sub>3</sub>OD)

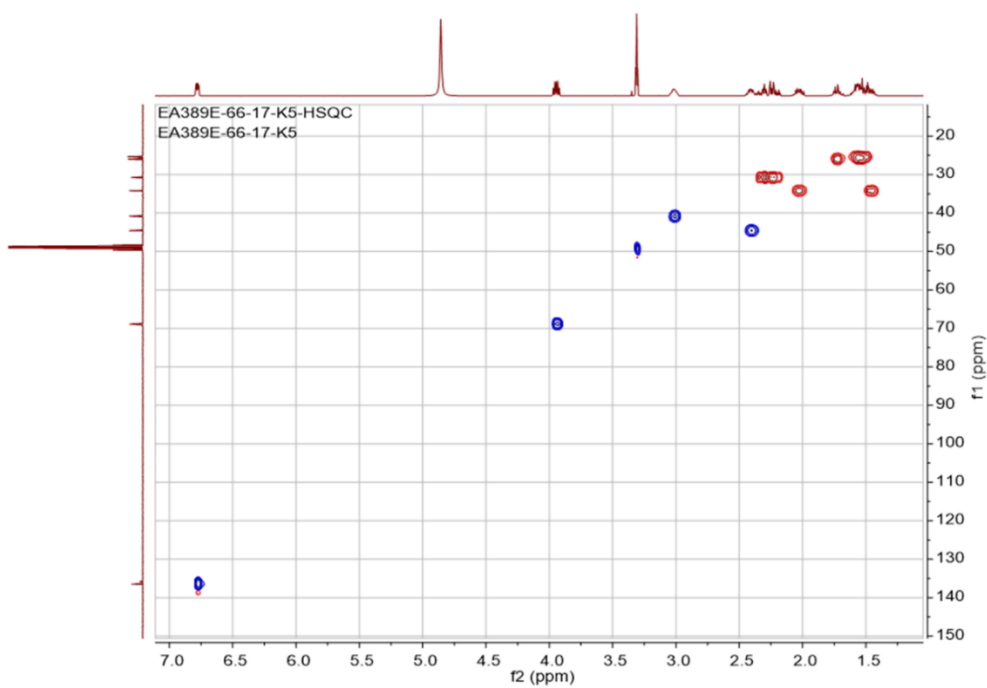

Figure S4. <sup>1</sup>H-<sup>13</sup>C HSQC NMR spectrum of **1** (CD<sub>3</sub>OD)

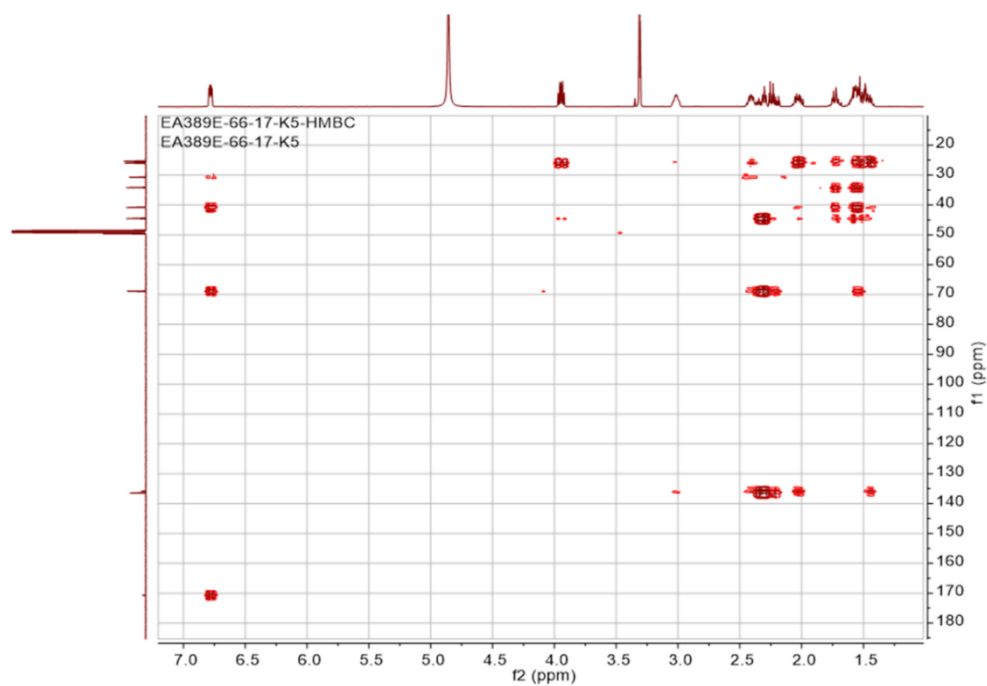

Figure S5.  $^1\text{H}$ - $^{13}\text{C}$  HMBC NMR spectrum of **1** ( $\text{CD}_3\text{OD}$ )

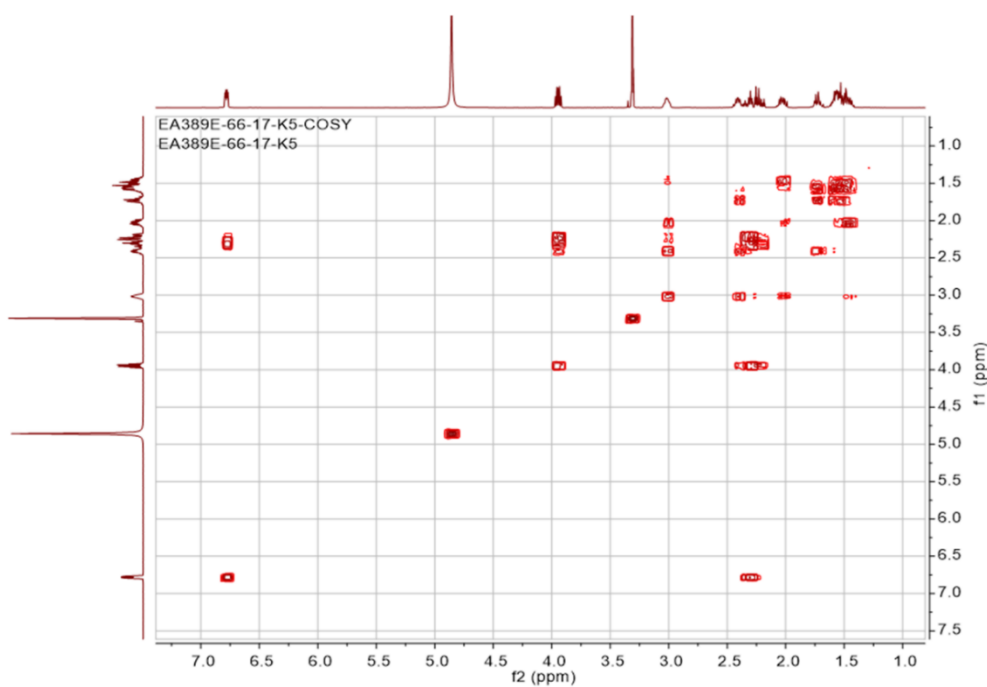

Figure S6.  $^1\text{H}$ - $^1\text{H}$  COSY NMR spectrum of **1** ( $\text{CD}_3\text{OD}$ )

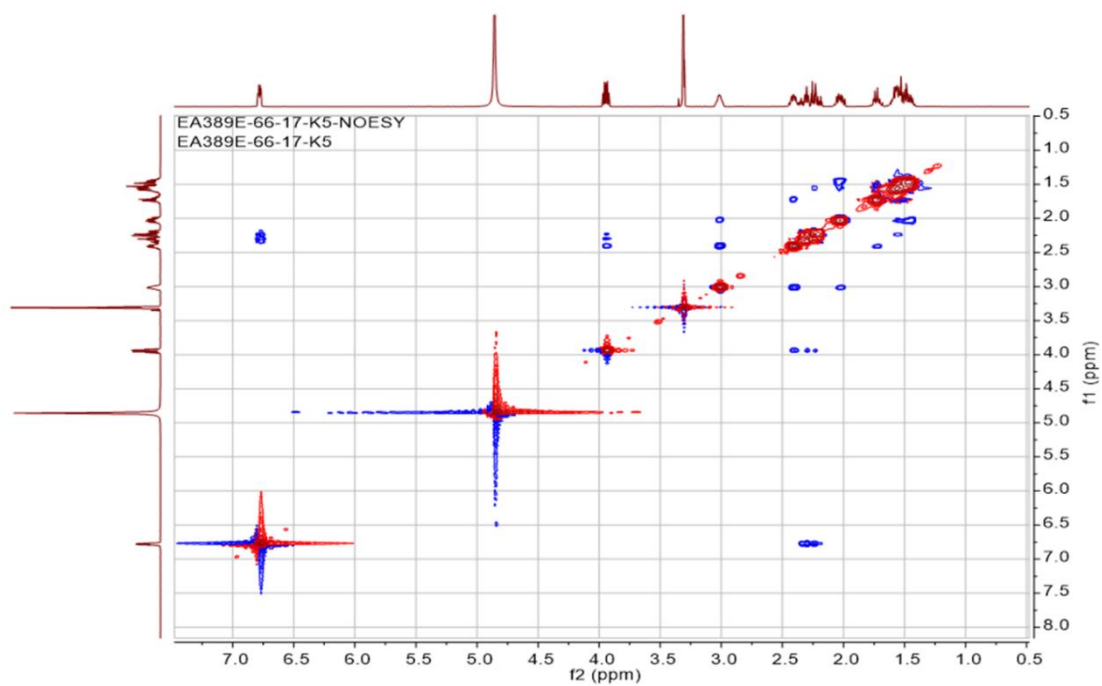

Figure S7. <sup>1</sup>H-<sup>1</sup>H NOESY NMR spectrum of **1** (CD<sub>3</sub>OD)

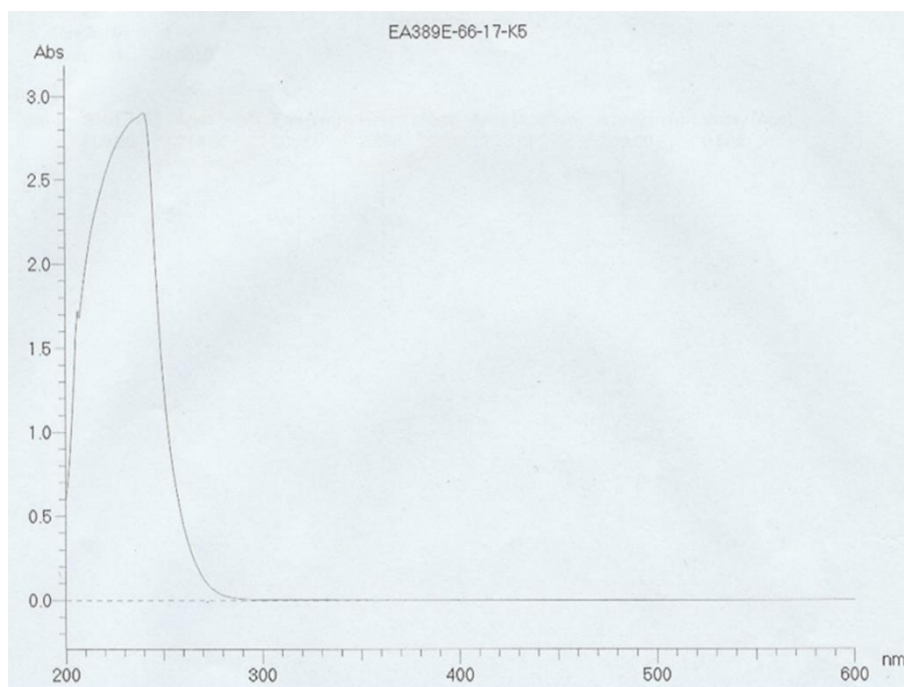

Figure S8. UV spectrum of **1**



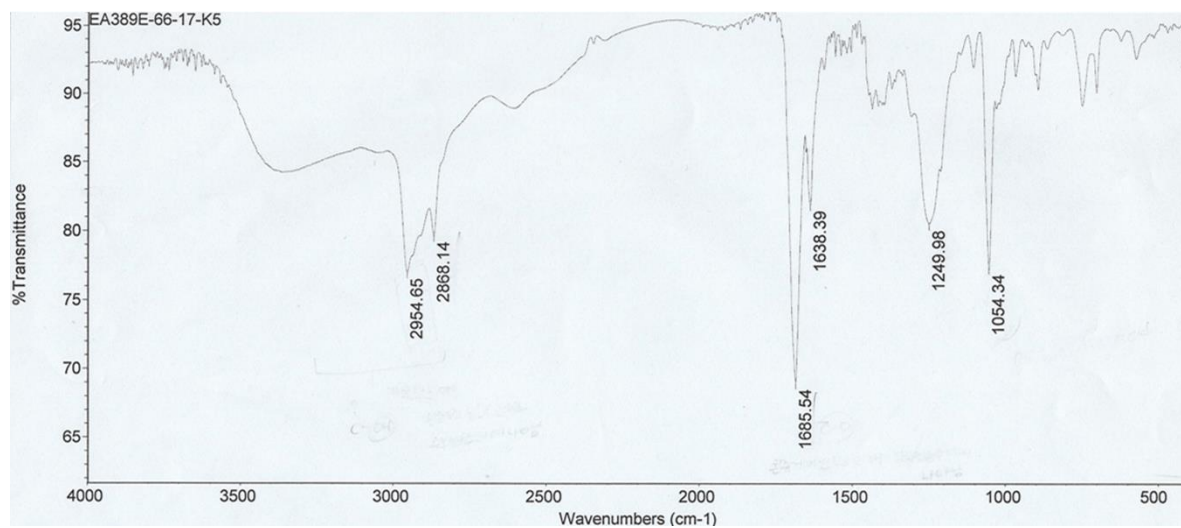

Figure S9. IR spectrum of **1**

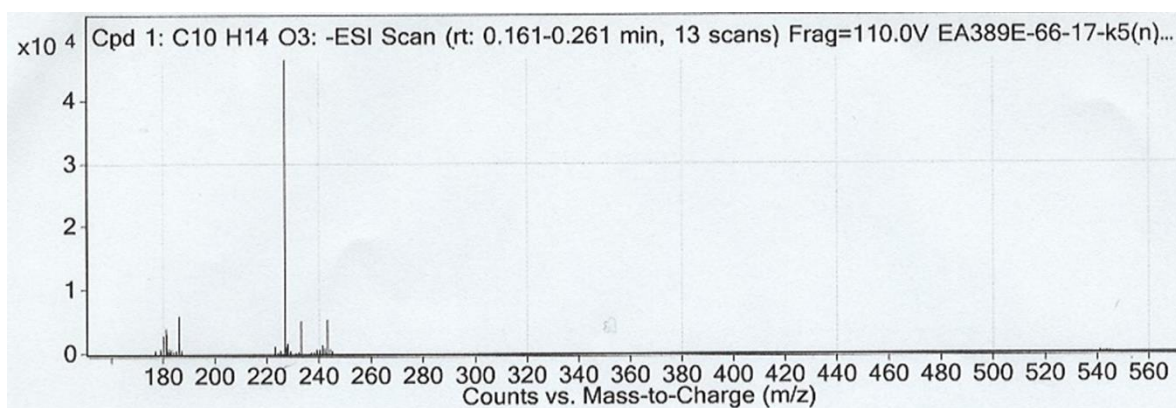

Figure S10. HRESIMS spectrum of **1**

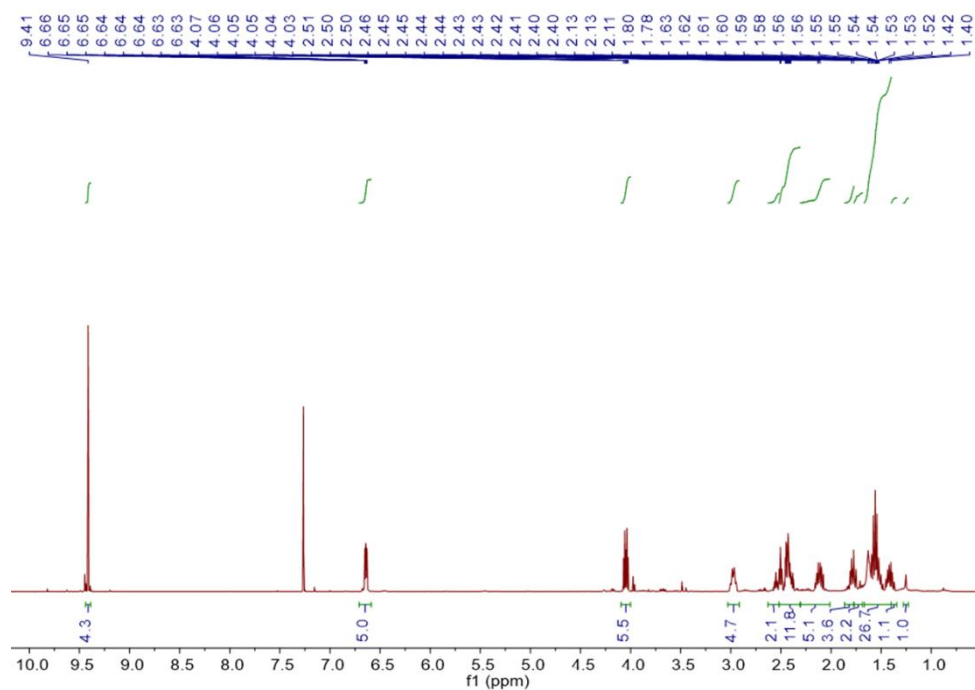

Figure S11. <sup>1</sup>H NMR spectrum of **2** (400 MHz, CDCl<sub>3</sub>)

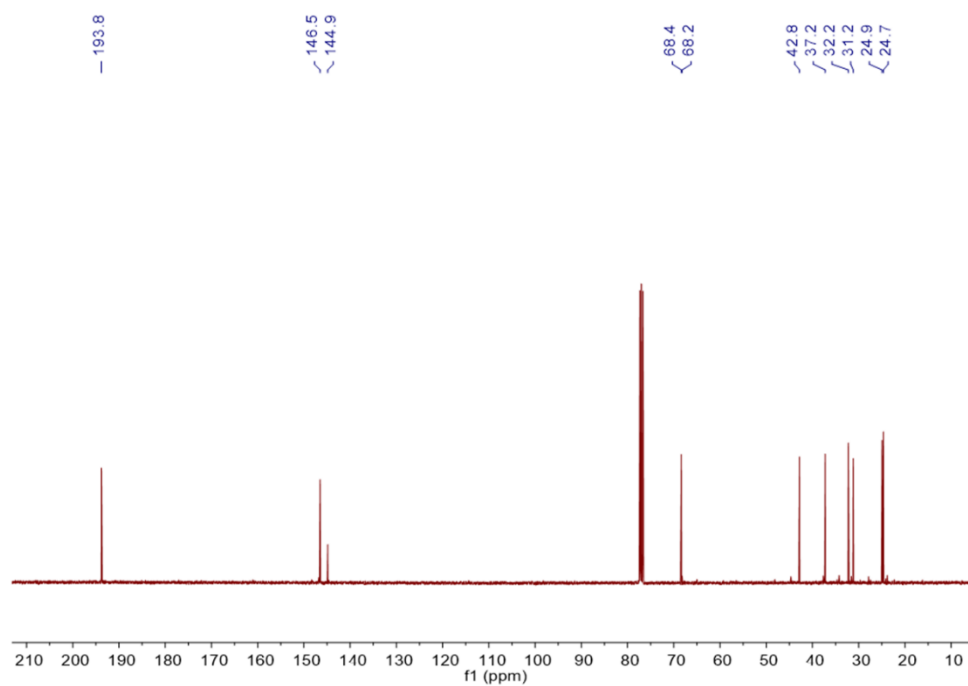

Figure S12. <sup>13</sup>C NMR spectrum of **2** (100 MHz, CDCl<sub>3</sub>)

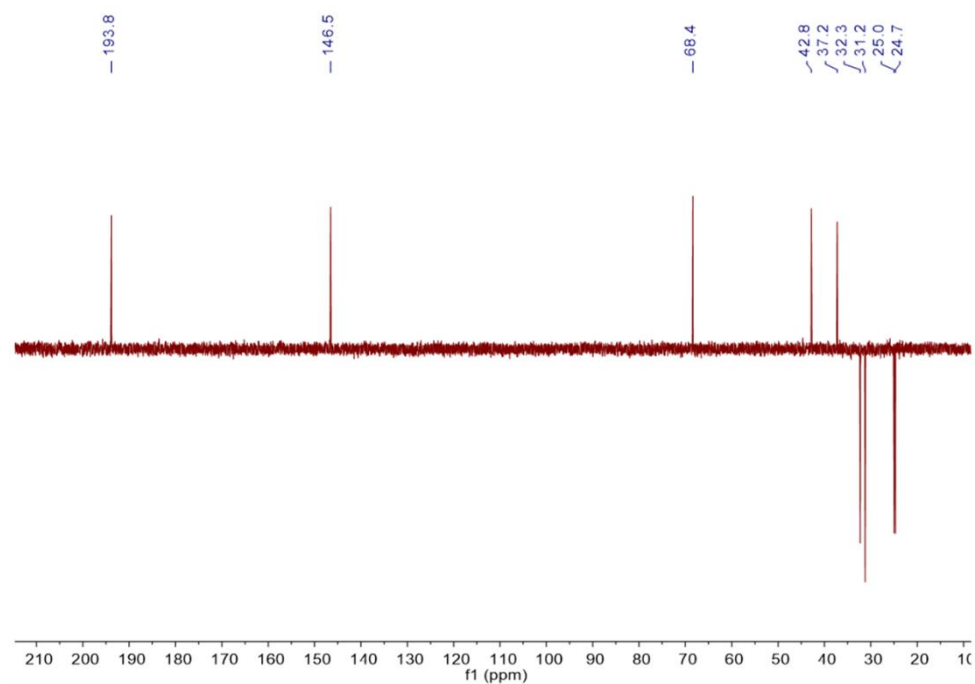

Figure S13. DEPT-135 NMR spectrum of **2** (100 MHz, CDCl<sub>3</sub>)

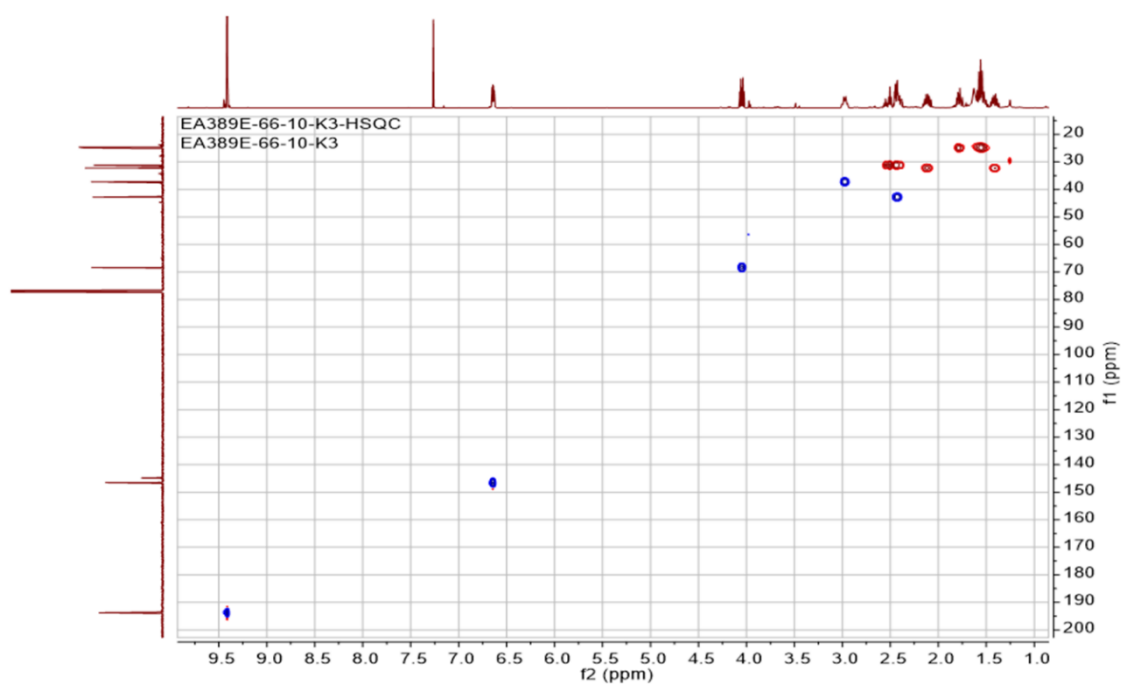

Figure S14. <sup>1</sup>H-<sup>13</sup>C HSQC NMR spectrum of **2** (CDCl<sub>3</sub>)

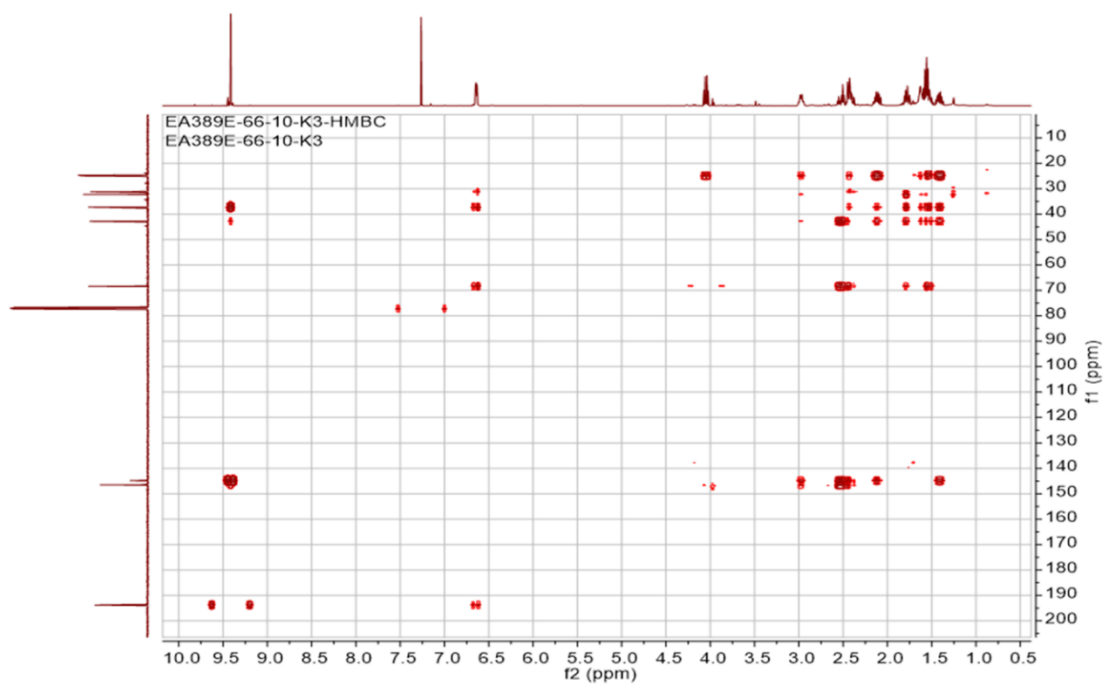

Figure S15.  $^1\text{H}$ - $^{13}\text{C}$  HMBC NMR spectrum of **2** ( $\text{CDCl}_3$ )

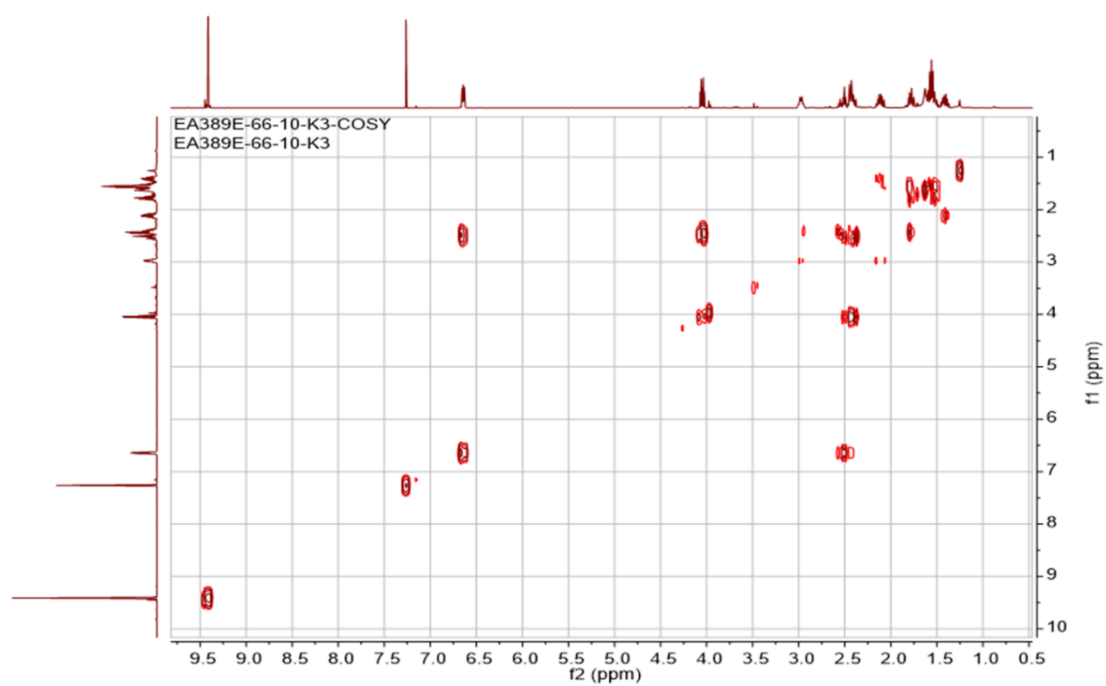

Figure S16.  $^1\text{H}$ - $^1\text{H}$  COSY NMR spectrum of **2** ( $\text{CDCl}_3$ )

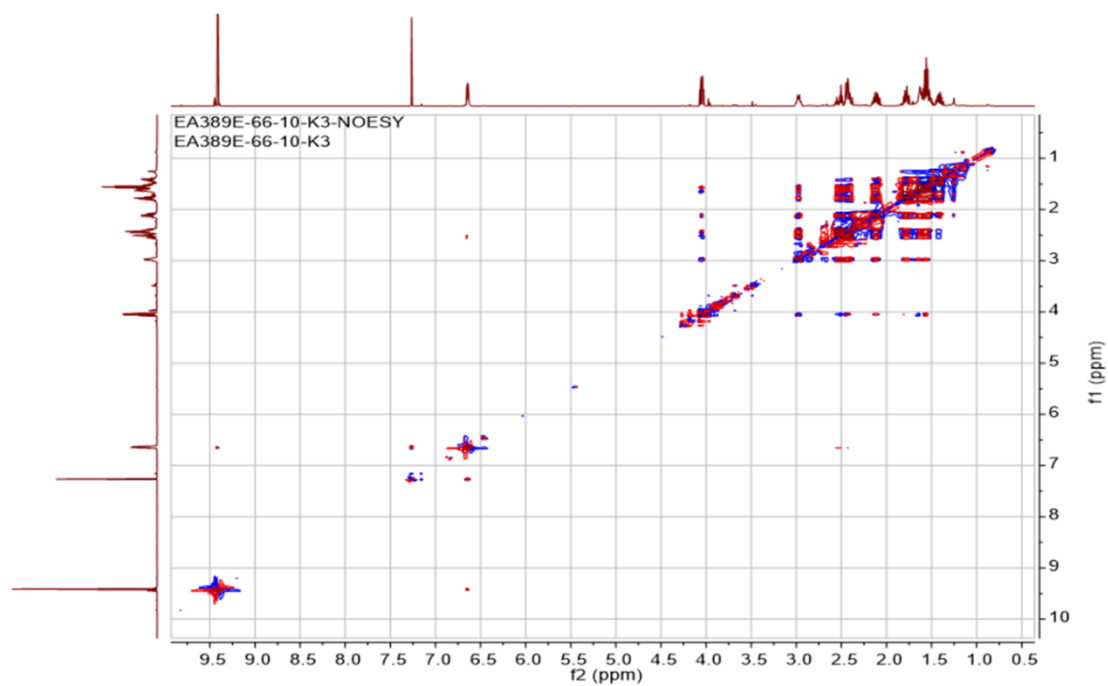

Figure S17. <sup>1</sup>H-<sup>1</sup>H NOESY NMR spectrum of **2** (CDCl<sub>3</sub>)

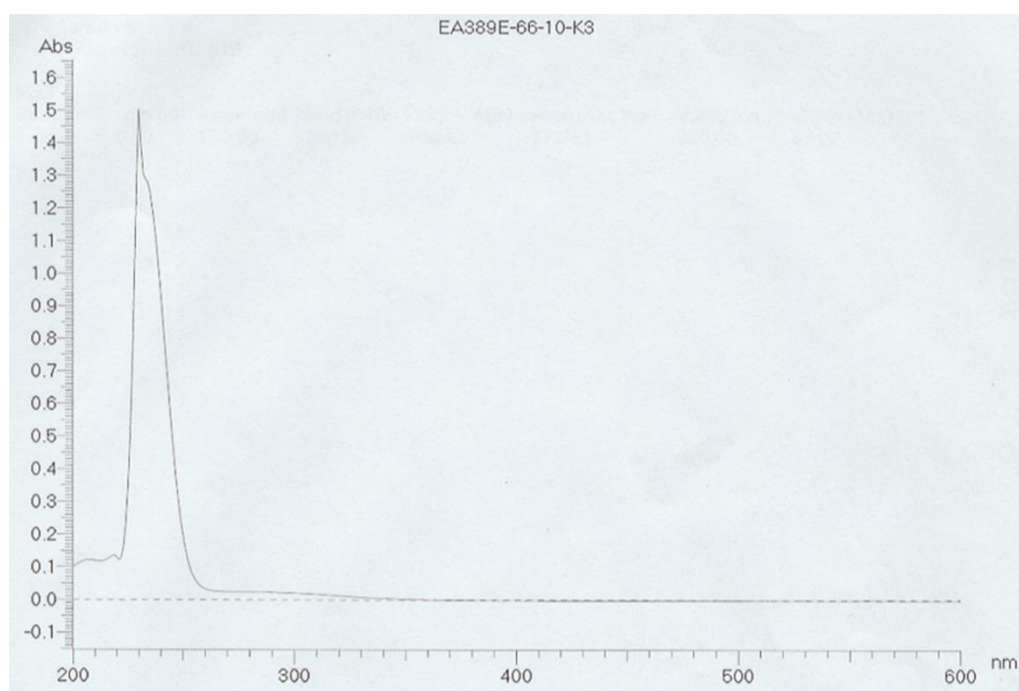

Figure S18. UV spectrum of **2**

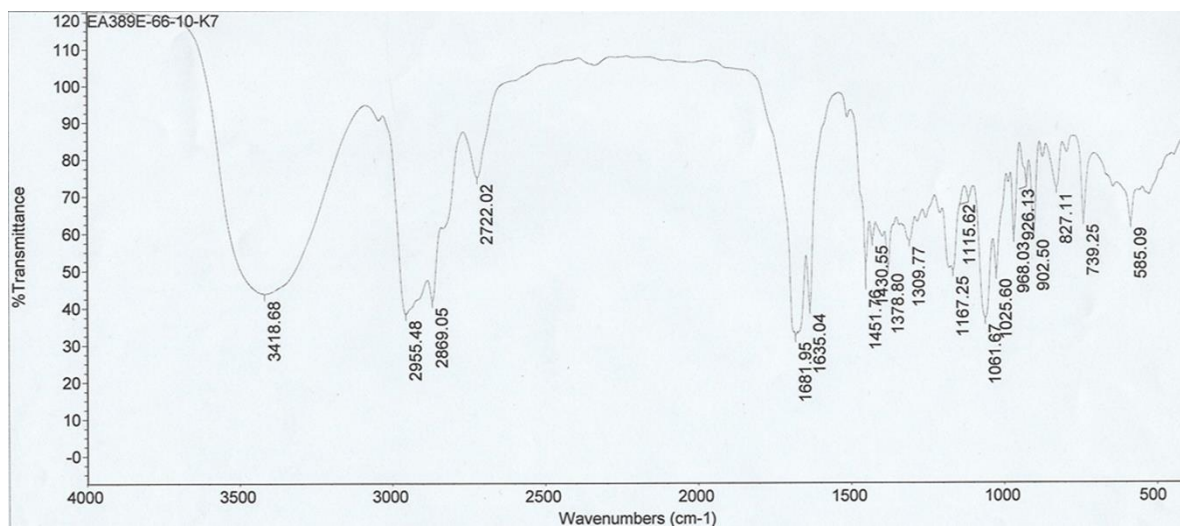

Figure S19. IR spectrum of **2**

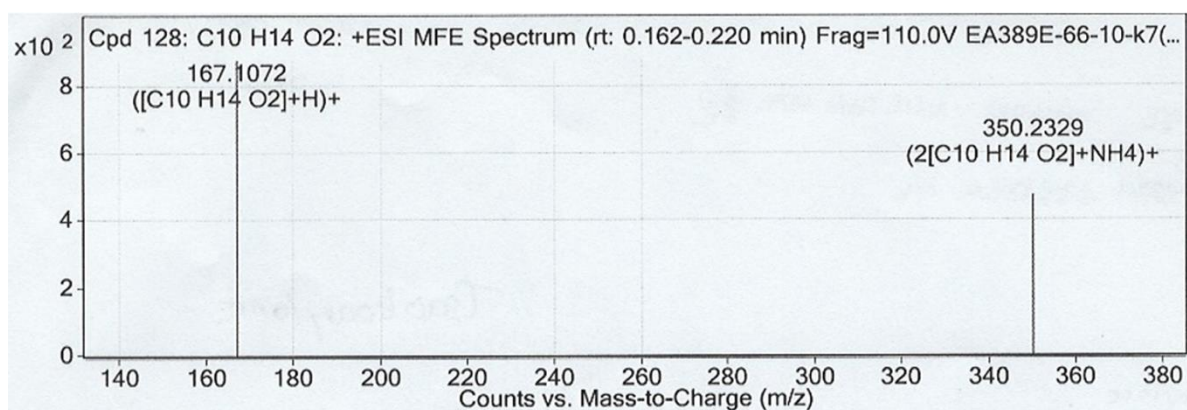

Figure S20. HRESIMS spectrum of **2**

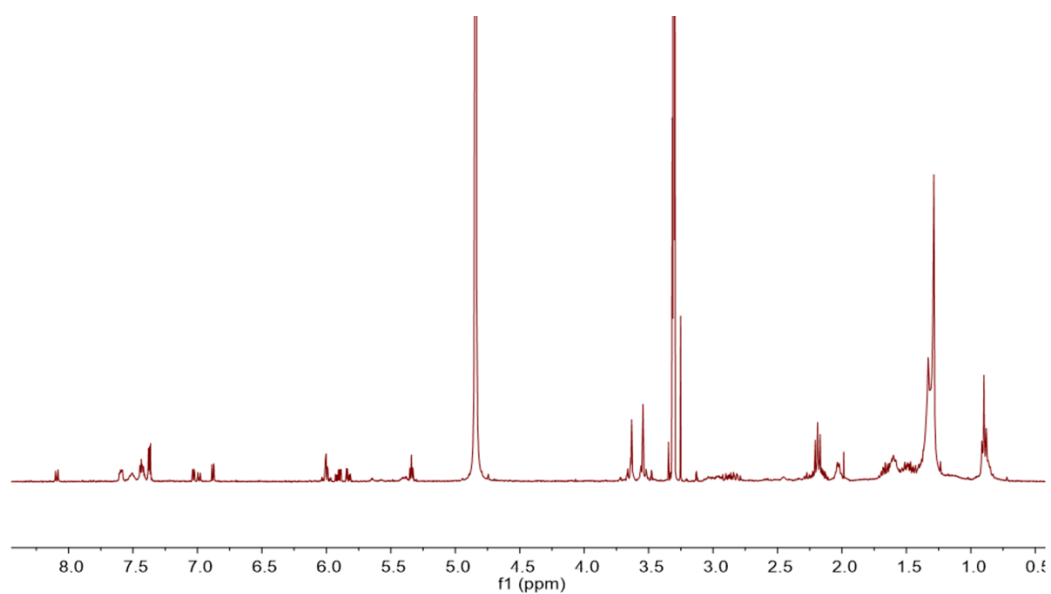

Figure S21.  $^1\text{H}$ -NMR (400 MHz,  $\text{CD}_3\text{OD}$ ) of (R)-MTPA ester of **1**

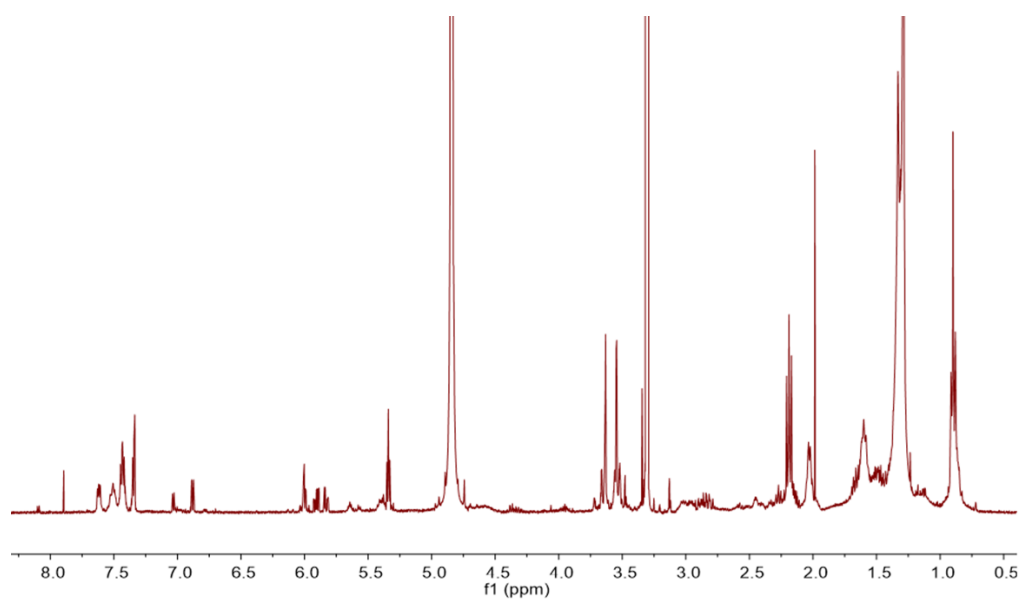

Figure S22.  $^1\text{H}$ -NMR (400 MHz,  $\text{CD}_3\text{OD}$ ) of (S)-MTPA ester of **1**

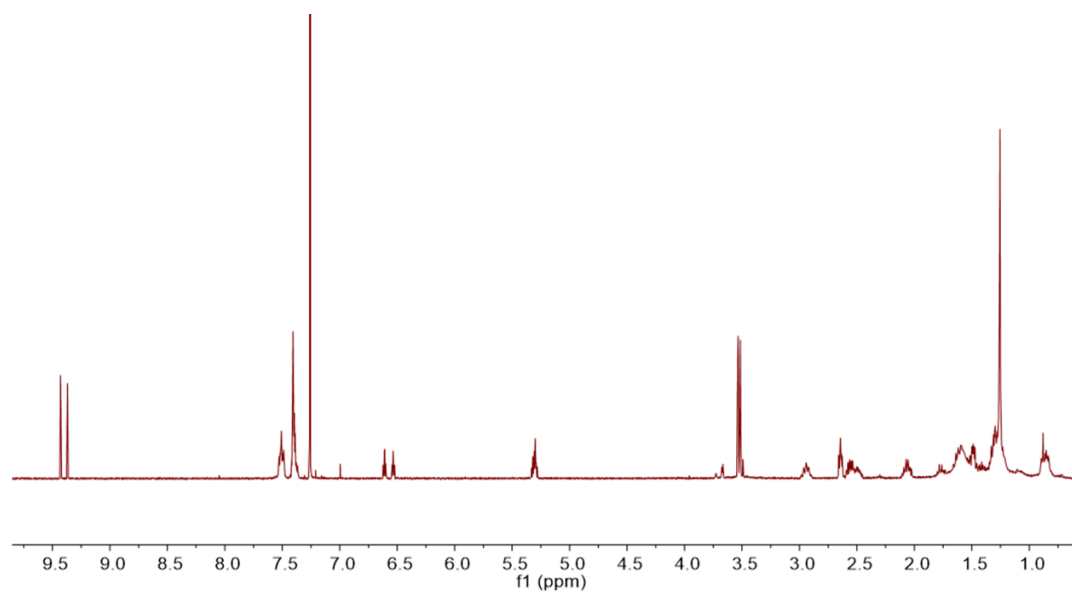

Figure S23.  $^1\text{H}$ -NMR (400 MHz,  $\text{CDCl}_3$ ) of (R)-MTPA ester of **2**

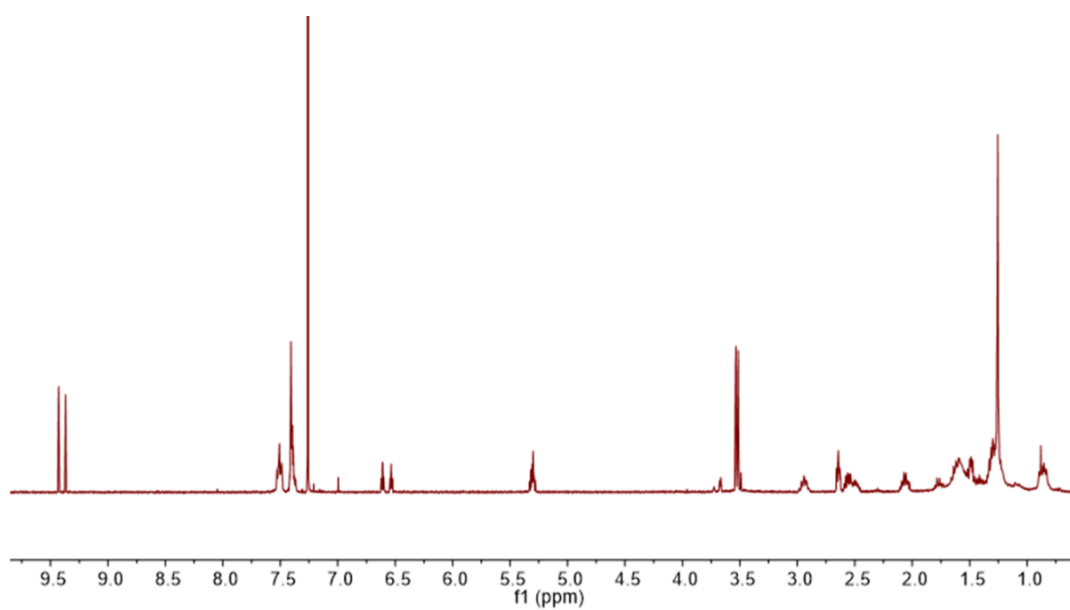

Figure S24.  $^1\text{H}$ -NMR (400 MHz,  $\text{CDCl}_3$ ) of (S)-MTPA ester of **2**
